# Supplementary material
Source: ML conference proceedings conference paper supplement (https://openreview.net/forum?id=83grvoIJRnb)
Supplement: supplementary_material [file attachment]

Archive with 1 entries (1 files):
- iclr_suppl.pdf
